# Supplementary material for: A boreal invasion in response to climate change? Range shifts and community effects in the borderland between forest and tundra
Source: Springer Nature journal article supplement (doi:10.1007/s13280-014-0606-8), 2015-01-01
Supplement: MOESM1 [file 15654196]

AMBIO

**Electronic supplementary material**

*This supplementary material has not been peer reviewed.*

**A boreal invasion in response to climate change? Range shifts and  
community effects in the borderland between forest and tundra**

Bodil Elmhagen, Jonas Kindberg, Peter Hellström, Anders Angerbjörn

## **MATERIALS AND METHODS – EXTENDED VERSION**

In this paper, we review observed changes in the distribution, abundance and dynamics of birds and mammals in boreal and alpine Sweden since the 19<sup>th</sup> century, as well as suggested drivers of change.

The first part of the review is an overview of known changes in southern and northern birds. According to our definition (see paper), 118 of the 196 species which regularly breed in boreal or alpine Sweden had a southern or northern distribution (Table S1). The remaining 78 species, i.e. the ones not included in the paper (Table S2), were species which did not have one distinct latitudinal or altitudinal distribution limit in boreal or alpine Fennoscandia. Their distribution could instead be, for example, eastern or western (i.e. they have both a southern and a northern distribution limit in boreal/alpine Fennoscandia), patchy (e.g. including both alpine tundra and coasts), coastal, omnipresent (i.e. the distribution covered all of Fennoscandia), or a distribution caused by an introduction or large-scale European range expansion during the 20<sup>th</sup> century which meant that the species was not present at the beginning of the study period (Table S2). To not exclude southern species which might have expanded north throughout Sweden since the 19<sup>th</sup> century and at present consequently have a northern distribution limit slightly north of Sweden, we classified species as southern based on their northern distribution limit in Fennoscandia. However, our source of information on long-term range shifts and population trends in Swedish birds (Svensson et al. 1999), only reported the present distribution within Sweden. We therefore based our classification on distribution maps in Grant and Svensson (1999). For Sweden, the distribution maps in Svensson et al. (1999) correspond highly with those in Grant and Svensson (1999).

Svensson et al. (1999) compiled quantitative and qualitative information on

Swedish bird species, including a section on the history of each species since the 19<sup>th</sup> century. For each of the 118 southern and northern species, we used the historical information provided by Svensson et al. (1999) to assess long-term trends, defined as the net change in the range or abundance of each species between the 19<sup>th</sup> century and late 20<sup>th</sup> century. Firstly, we noted whether the distribution limit was known to have changed (range contraction or expansion). Such information on range shifts were found for 6 northern and 28 southern species. Secondly, if the distribution limit had not changed, we noted whether the information provided could be interpreted as a net change in abundance (long-term increasing or declining trend). This was the case for 11 northern and 23 southern birds. For one declining species (*Charadrius morinellus*), this trend classification was based on sources from Finland, which substantiated a general declining trend in Europe. For all other species, the trend classification was based on information from Sweden. We classified the remaining 50 species as having "no long-term trend", which meant that we could not interpret the provided information as an overall increase or decline. This category included (1) species where the population size had been stable; (2) species which had experienced fluctuations without a directional trend, e.g. decline(s) followed by recovery; (3) species where there had been locally different trends within the study area; (4) species where no information was available.

The second part of the review includes information which we assessed from yearly reports on forestry published by Sweden's Official Statistics between 1870 and 1966. We refer to these reports as one source (Sweden's Official Statistics 1870-1966). The reports summarize information provided by e.g. foresters to the person(s) writing the reports. The contents vary somewhat over time, suggesting it was partly up to the writer(s) to decide what information to include. In most years, however, the reports include brief qualitative statements on the status of game species and predators

in different parts of Sweden. For example, it could be stated in which parts of Sweden a persecuted species still was found, or which areas an expanding species had reached. For game species, the availability in a particular district, county or over a larger region could be described as e.g. "plenteous", "abundant", "good", "average", "scanty", "abysmal", "increasing/declining since last year", or "no change since last year". We refer to the reports both to describe change in species distributions, and to describe the local dynamics of some game species in the county of Västerbotten in 1870-1966. For the latter, we reclassified the qualitative descriptions of the status of each species each year into five categories; abundant, good, average, below average and scarce. In years when a species was described as increasing or decreasing since last year, we changed the classification one step up or down, respectively. If a species was described as increasing or decreasing for several years, we extrapolated the yearly status during this time period. For example, if the availability of a species was described as scarce in year 1, increasing in the next three years, and then as average in year 5, we extrapolated the degree of increase from scarce to average in the intermediate years. Regarding the quality of the reports, we think it is reasonable to assume that the overall picture is reliable, although the accuracy of each individual piece of information probably varies depending on the meticulousness of individual reporters and writers.

To illustrate temperature trends in northern Sweden, we retrieved temperature data from the Swedish Meteorological and Hydrological Institute. Four weather stations were operating continuously from 1862 to the early 2000s. We used this data to calculate a 10-year running mean in yearly temperature.

We use data from a survey of a raptor guild in Stora Sjöfallet National Park (67°29'N 18°21'E) to illustrate potential northern advancement in Eurasian kestrels (*Falco tinnunculus*) since the 1970s. For comparison, we also showed data on rough-

legged buzzards (*Buteo lagopus*). Surveys were carried out at this location, comprising the same nest sites, in 1970-1978 and 2001-2011 (Broo and Lindberg 1981, Hellström 2014). The densities of the two species were estimated as the number of breeding pairs per 10 km<sup>2</sup>, where breeding pairs were defined as pairs which initiated egg clutches. Number of breeding pairs varied between 0 to 35 for kestrels and 0 to 70 for rough legged buzzards.

We exemplify northern and northwestern advancement in game species using estimated hunting bags provided by the Swedish Association for Hunting and Wildlife Management. The association collects yearly reports from hunters throughout Sweden and estimate regional hunting bags by extrapolating the number of animals killed in reported areas to the area of counties (Elmhagen et al. 2011). Since 1997, hunting bags are also estimated for hunting districts within counties.

## References

- Broo, B., and P. Lindberg. 1981. Exploitation of the Ritsem area – effects on the fauna, especially raptors. Statens naturvårdsverk, Solna. (in Swedish)
- Dyntaxa (2013) Swedish Taxonomic Database. Accessed at <http://www.dyntaxa.se/taxon/> at 02-12-2014.
- Hellström, P. 2014. Predator responses to non-stationary rodent cycles. PhD thesis, Stockholm University.
- Grant, P.J., and L. Svensson (ed.). 1999. *The Bird Guide. Europe and Mediterranean birds in the field*. Albert Bonniers Förlag, Stockholm, Sweden. (in Swedish)
- Svensson, S., M. Svensson, and M. Tjernberg. 1999. *Swedish Bird Atlas*. The Swedish Species Information Centre and the Sweden's Ornithological Society. (In Swedish)
- Sweden's Official Statistics. 1870-1966. Forestry. Yearly reports. Norstedt & Söner,

Stockholm, Sweden. (in Swedish)

Table S1. The 118 species that were classified as having either a southern (S) or northern (N) distribution in boreal/alpine Sweden. For each species, the change assessed from Svensson et al. (1999) is described as a range shift (contraction or expansion), a long-term trend in abundance (increase or decline) or as no change (none). The category “no change” includes both species which did not show a long-term change in abundance (see text) and species for which no data were available. For all species which showed either a range shift or a long-term trend, suggested drivers of change were assessed from Svensson et al. (1999). Nomenclature following Dyntaxa (2013).

| <b>Species</b>                    | <b>Common name</b>         | <b>S or N</b> | <b>Change</b> | <b>Suggested drivers of change</b>                                                       |
|-----------------------------------|----------------------------|---------------|---------------|------------------------------------------------------------------------------------------|
| <i>Accipiter gentilis</i>         | northern goshawk           | S             | None          |                                                                                          |
| <i>Accipiter nisus</i>            | Eurasian sparrowhawk       | S             | None          |                                                                                          |
| <i>Acrocephalus scirpaceus</i>    | Eurasian reed warbler      | S             | Expansion     | land-use change (agriculture and eutrophication)                                         |
| <i>Aegithalos caudatus</i>        | long-tailed bushtit        | S             | None          |                                                                                          |
| <i>Aegolius funereus</i>          | boreal owl                 | S             | None          |                                                                                          |
| <i>Alauda arvensis</i>            | Eurasian skylark           | S             | None          |                                                                                          |
| <i>Anas crecca</i>                | Eurasian teal              | S             | Decline       | land-use change (drainage of wet habitats)                                               |
| <i>Anas penelope</i>              | Eurasian wigeon            | N             | None          |                                                                                          |
| <i>Anas platyrhynchos</i>         | mallard                    | S             | Increase      | unknown                                                                                  |
| <i>Anser erythropus</i>           | lesser white-fronted goose | N             | Decline       | hunting, predation, change in overwintering areas                                        |
| <i>Anser fabalis</i>              | bean goose                 | N             | Decline       | hunting, land-use change (agriculture and drainage of wet habitats)                      |
| <i>Anthus cervinus</i>            | red-throated pipit         | N             | None          |                                                                                          |
| <i>Anthus trivialis</i>           | tree pipit                 | S             | Decline       | land-use change (agriculture), change in overwintering areas                             |
| <i>Apus apus</i>                  | common swift               | S             | Increase      | other human-related factors (more nesting sites)                                         |
| <i>Asio otus</i>                  | long-eared owl             | S             | None          |                                                                                          |
| <i>Aythya marila</i>              | greater scaup              | N             | Decline       | unknown                                                                                  |
| <i>Bubo scandiacus</i>            | snowy owl                  | N             | Contraction   | disrupted rodent dynamics                                                                |
| <i>Buteo buteo</i>                | common buzzard             | S             | None          |                                                                                          |
| <i>Buteo lagopus</i>              | roughleg                   | N             | None          |                                                                                          |
| <i>Calcarius lapponicus</i>       | Lapland longspur           | N             | None          |                                                                                          |
| <i>Calidris alpina alpina</i>     | dunlin                     | N             | None          |                                                                                          |
| <i>Calidris falcinellus</i>       | broad-billed sandpiper     | N             | Contraction   | land-use change (agriculture) and drainage of wet habitats                               |
| <i>Calidris maritima</i>          | purple sandpiper           | N             | None          |                                                                                          |
| <i>Calidris temminckii</i>        | Temminck's stint           | N             | Decline       | land-use change (agriculture)                                                            |
| <i>Caprimulgus europaeus</i>      | European nightjar          | S             | Decline       | land-use change (agriculture), change in overwintering areas                             |
| <i>Carduelis cannabina</i>        | common linnet              | S             | Decline       | land-use change (agriculture)                                                            |
| <i>Carduelis chloris</i>          | European greenfinch        | S             | Expansion     | other human-related factors (e.g. favored by feeding and associated with built-up areas) |
| <i>Carduelis flammea flammea</i>  | common redpoll             | N             | None          |                                                                                          |
| <i>Carduelis hornemanni</i>       | Arctic redpoll             | N             | None          |                                                                                          |
| <i>Carduelis spinus</i>           | Eurasian siskin            | S             | None          |                                                                                          |
| <i>Certhia familiaris</i>         | Eurasian treecreeper       | S             | None          |                                                                                          |
| <i>Charadrius dubius</i>          | little ringed plover       | S             | Expansion     | other human-related factors (associated with exploited areas)                            |
| <i>Charadrius morinellus</i>      | Eurasian dotterel          | N             | Decline       | hunting, change in overwintering areas                                                   |
| <i>Chroicocephalus ridibundus</i> | black-headed gull          | S             | Expansion     | unknown                                                                                  |
| <i>Clangula hyemalis</i>          | long-tailed duck           | N             | None          |                                                                                          |
| <i>Columba oenas</i>              | stock dove                 | S             | None          |                                                                                          |

|                                  |                           |   |             |                                                                                                                        |
|----------------------------------|---------------------------|---|-------------|------------------------------------------------------------------------------------------------------------------------|
| <i>Columba palumbus</i>          | common wood pigeon        | S | Increase    | land-use change (agriculture), other human-related factors (associated with built-up areas)                            |
| <i>Corvus corone</i>             | hooded crow               | S | None        |                                                                                                                        |
| <i>Corvus monedula</i>           | western jackdaw           | S | Expansion   | land-use change (agriculture), other human-related factors (associated with built-up areas)                            |
| <i>Cuculus canorus</i>           | common cuckoo             | S | Decline     | unknown                                                                                                                |
| <i>Cyanistes caeruleus</i>       | Eurasian blue tit         | S | Expansion   | land-use change (agriculture), other human-related factors (e.g. favored by built-up areas, feeding and nesting boxes) |
| <i>Cygnus olor</i>               | mute swan                 | S | Expansion   | land-use change causing eutrophication, climate change                                                                 |
| <i>Delichon urbicum</i>          | common house martin       | S | None        |                                                                                                                        |
| <i>Dendrocopos major</i>         | great spotted woodpecker  | S | Increase    | land-use change (forestry), other human-related factors (feeding)                                                      |
| <i>Dendrocopos minor</i>         | lesser spotted woodpecker | S | Decline     | land-use change (forestry)                                                                                             |
| <i>Dryocopus martius</i>         | black woodpecker          | S | None        |                                                                                                                        |
| <i>Emberiza citrinella</i>       | yellowhammer              | S | None        |                                                                                                                        |
| <i>Eremophila alpestris</i>      | horned lark               | N | Decline     | unknown                                                                                                                |
| <i>Erithacus rubecula</i>        | European robin            | S | None        |                                                                                                                        |
| <i>Falco columbarius</i>         | merlin                    | N | Decline     | land-use change (agriculture)                                                                                          |
| <i>Falco rusticolus</i>          | gyrfalcon                 | N | None        |                                                                                                                        |
| <i>Falco tinnunculus</i>         | common kestrel            | S | None        |                                                                                                                        |
| <i>Ficedula hypoleuca</i>        | European pied flycatcher  | S | None        |                                                                                                                        |
| <i>Fringilla coelebs</i>         | chaffinch                 | S | None        |                                                                                                                        |
| <i>Fulica atra</i>               | Eurasian coot             | S | Expansion   | land-use change (drainage of wet habitats specifically lowered water level in lakes, eutrophication)                   |
| <i>Gallinago media</i>           | great snipe               | N | Contraction | land-use change (drainage of wet habitats), hunting                                                                    |
| <i>Garrulus glandarius</i>       | Eurasian jay              | S | Expansion   | unknown                                                                                                                |
| <i>Gavia stellata</i>            | red-throated loon         | N | Decline     | land-use change (agriculture, drainage of wet habitats)                                                                |
| <i>Glaucidium passerinum</i>     | Eurasian pygmy owl        | S | None        |                                                                                                                        |
| <i>Hippolais icterina</i>        | icterine warbler          | S | None        |                                                                                                                        |
| <i>Hirundo rustica</i>           | barn swallow              | S | Decline     | land-use change (agriculture)                                                                                          |
| <i>Jynx torquilla</i>            | Eurasian wryneck          | S | Decline     | land-use change (agriculture)                                                                                          |
| <i>Lagopus lagopus</i>           | willow ptarmigan          | N | Contraction | unknown                                                                                                                |
| <i>Lagopus muta</i>              | rock ptarmigan            | N | Decline     | reindeer grazing                                                                                                       |
| <i>Lanius collurio</i>           | red-backed shrike         | S | Decline     | land-use change (agriculture), change in overwintering areas                                                           |
| <i>Larus canus</i>               | mew gull                  | S | Expansion   | unknown                                                                                                                |
| <i>Limosa lapponica</i>          | bar-tailed godwit         | N | None        |                                                                                                                        |
| <i>Lophophanes cristatus</i>     | European crested tit      | S | Expansion   | climate change                                                                                                         |
| <i>Loxia curvirostra</i>         | red crossbill             | S | None        |                                                                                                                        |
| <i>Loxia pytyopsittacus</i>      | parrot crossbill          | S | None        |                                                                                                                        |
| <i>Luscinia luscinia</i>         | thrush nightingale        | S | None        |                                                                                                                        |
| <i>Luscinia svecica</i>          | bluethroat                | N | None        |                                                                                                                        |
| <i>Lyrurus tetrix</i>            | black grouse              | S | Decline     | land-use change (drainage of wet habitats)                                                                             |
| <i>Melanitta nigra</i>           | black scoter              | N | None        |                                                                                                                        |
| <i>Mergus merganser</i>          | common merganser          | S | None        |                                                                                                                        |
| <i>Mergus serrator</i>           | red-breasted merganser    | S | Decline     | land-use change causing eutrophication                                                                                 |
| <i>Motacilla flava thunbergi</i> | yellow wagtail            | S | Increase    | land-use change (forestry)                                                                                             |
| <i>Muscicapa striata</i>         | spotted flycatcher        | S | None        |                                                                                                                        |
| <i>Numenius arquata</i>          | Eurasian curlew           | S | Expansion   | land-use change (agriculture, drainage of wet habitats)                                                                |



|                                 |                           |   |             |                                                                                |
|---------------------------------|---------------------------|---|-------------|--------------------------------------------------------------------------------|
| <i>Numenius phaeopus</i>        | whimbrel                  | N | Expansion   | unknown                                                                        |
| <i>Parus major</i>              | great tit                 | S | Expansion   | unknown                                                                        |
| <i>Passer domesticus</i>        | house sparrow             | S | Decline     | land-use change (agriculture)                                                  |
| <i>Passer montanus</i>          | Eurasian tree sparrow     | S | Expansion   | other human-related factors (associated with gardens)                          |
| <i>Periparus ater</i>           | coal tit                  | S | Expansion   | land-use change (forestry)                                                     |
| <i>Pernis apivorus</i>          | European honey buzzard    | S | Decline     | change in overwintering areas                                                  |
| <i>Phalaropus lobatus</i>       | red-necked phalarope      | N | None        |                                                                                |
| <i>Phoenicurus phoenicurus</i>  | common redstart           | S | Decline     | Land-use change (forestry)                                                     |
| <i>Phylloscopus sibilatrix</i>  | wood warbler              | S | Expansion   | unknown                                                                        |
| <i>Phylloscopus trochilus</i>   | willow warbler            | S | None        |                                                                                |
| <i>Pica pica</i>                | Eurasian magpie           | S | Expansion   | land-use change (agriculture), other human-related factors (decreased hunting) |
| <i>Picus viridis</i>            | European green woodpecker | S | Decline     | land-use change (agriculture, forestry)                                        |
| <i>Plectrophenax nivalis</i>    | snow bunting              | N | None        |                                                                                |
| <i>Pluvialis apricaria</i>      | European golden plover    | N | Decline     | land-use change (agriculture, forestry)                                        |
| <i>Podiceps cristatus</i>       | great crested grebe       | S | Expansion   | Land-use change (eutrophication)                                               |
| <i>Poecile montanus</i>         | willow tit                | S | Decline     | land-use change (forestry)                                                     |
| <i>Prunella modularis</i>       | dunnock                   | S | Expansion   | land-use change (forestry)                                                     |
| <i>Pyrrhula pyrrhula</i>        | Eurasian bullfinch        | S | Expansion   | unknown                                                                        |
| <i>Regulus regulus</i>          | goldcrest                 | S | None        |                                                                                |
| <i>Riparia riparia</i>          | sand martin               | S | None        |                                                                                |
| <i>Saxicola rubetra</i>         | whinchat                  | S | None        |                                                                                |
| <i>Scolopax rusticola</i>       | Eurasian woodcock         | S | None        |                                                                                |
| <i>Sitta europaea</i>           | Eurasian nuthatch         | S | Expansion   | unknown                                                                        |
| <i>Stercorarius longicaudus</i> | long-tailed jaeger        | N | None        |                                                                                |
| <i>Strix aluco</i>              | tawny owl                 | S | None        |                                                                                |
| <i>Sturnus vulgaris</i>         | common starling           | S | Expansion   | land-use change (agriculture)                                                  |
| <i>Sylvia atricapilla</i>       | Eurasian blackcap         | S | Expansion   | land-use change (agriculture)                                                  |
| <i>Sylvia borin</i>             | garden warbler            | S | Expansion   | unknown                                                                        |
| <i>Sylvia communis</i>          | common whitethroat        | S | None        |                                                                                |
| <i>Sylvia curruca</i>           | lesser whitethroat        | S | Expansion   | land-use change (forestry)                                                     |
| <i>Tetrao urogallus</i>         | western capercaillie      | S | Decline     | land-use change (drainage of wet habitats, forestry), predation                |
| <i>Tringa glareola</i>          | wood sandpiper            | N | Decline     | land-use change (drainage of wet habitats)                                     |
| <i>Tringa ochropus</i>          | green sandpiper           | S | Expansion   | unknown                                                                        |
| <i>Troglodytes troglodytes</i>  | Eurasian wren             | S | Increase    | land-use change (forestry), climate change                                     |
| <i>Turdus merula</i>            | common blackbird          | S | Expansion   | unknown                                                                        |
| <i>Turdus philomelos</i>        | song thrush               | S | None        |                                                                                |
| <i>Turdus torquatus</i>         | ring ouzel                | N | Contraction | land-use change (agriculture)                                                  |
| <i>Turdus viscivorus</i>        | mistle thrush             | S | None        |                                                                                |
| <i>Vanellus vanellus</i>        | northern lapwing          | S | Expansion   | unknown                                                                        |

Table S2. The 78 species breeding in alpine or boreal Sweden that did not have a southern or northern distribution according to our definition, and thus were excluded from part one of the review. Nomenclature following Dyntaxa (2013).

| Species                           | Common name                | Distribution                                             |
|-----------------------------------|----------------------------|----------------------------------------------------------|
| <i>Acrocephalus schoenobaenus</i> | sedge warbler              | patchy                                                   |
| <i>Actitis hypoleucos</i>         | common sandpiper           | omnipresent                                              |
| <i>Alca torda</i>                 | razorbill                  | coastal                                                  |
| <i>Anas acuta</i>                 | northern pintail           | patchy                                                   |
| <i>Anas querquedula</i>           | garganey                   | patchy                                                   |
| <i>Anser anser</i>                | greylag goose              | coastal                                                  |
| <i>Anthus petrosus</i>            | rock pipit                 | coastal                                                  |
| <i>Anthus pratensis</i>           | meadow pipit               | omnipresent                                              |
| <i>Aquila chrysaetos</i>          | golden eagle               | patchy                                                   |
| <i>Arenaria interpres</i>         | ruddy turnstone            | coastal                                                  |
| <i>Asio flammeus</i>              | short-eared owl            | eastern                                                  |
| <i>Aythya ferina</i>              | common pochard             | eastern-coastal                                          |
| <i>Aythya fuligula</i>            | tufted duck                | eastern-patchy                                           |
| <i>Bombycilla garrulus</i>        | Bohemian waxwing           | eastern                                                  |
| <i>Branta canadensis</i>          | Canada goose               | introduced during study period                           |
| <i>Bubo bubo</i>                  | Eurasian eagle-owl         | eastern-patchy                                           |
| <i>Bucephala clangula</i>         | common goldeneye           | eastern                                                  |
| <i>Calidris pugnax</i>            | ruff                       | eastern-patchy                                           |
| <i>Carpodacus erythrinus</i>      | common rosefinch           | eastern-patchy                                           |
| <i>Cephus grylle</i>              | black guillemot            | coastal                                                  |
| <i>Charadrius hiaticula</i>       | common ringed plover       | coastal-patchy                                           |
| <i>Cinclus cinclus</i>            | white-throated dipper      | western (both southern and northern distribution limits) |
| <i>Circus cyaneus</i>             | northern harrier           | eastern                                                  |
| <i>Corvus corax</i>               | northern raven             | omnipresent                                              |
| <i>Corvus frugilegus</i>          | rook                       | patchy                                                   |
| <i>Cygnus cygnus</i>              | whooper swan               | eastern                                                  |
| <i>Emberiza hortulana</i>         | ortolan bunting            | eastern                                                  |
| <i>Emberiza pusilla</i>           | little bunting             | eastern-patchy (colonized during the 20th century)       |
| <i>Emberiza rustica</i>           | rustic bunting             | eastern                                                  |
| <i>Emberiza schoeniclus</i>       | reed bunting               | omnipresent                                              |
| <i>Falco peregrinus</i>           | peregrine falcon           | eastern-patchy                                           |
| <i>Falco subbuteo</i>             | Eurasian hobby             | eastern                                                  |
| <i>Fringilla montifringilla</i>   | brambling                  | eastern                                                  |
| <i>Gallinago gallinago</i>        | common snipe               | omnipresent                                              |
| <i>Gavia arctica</i>              | black-throated loon        | southern distribution limit south of boreal Sweden       |
| <i>Grus grus</i>                  | common crane               | eastern                                                  |
| <i>Haematopus ostralegus</i>      | Eurasian oystercatcher     | coastal                                                  |
| <i>Haliaeetus albicilla</i>       | white-tailed eagle         | patchy                                                   |
| <i>Hydrocoloeus minutus</i>       | little gull                | patchy                                                   |
| <i>Hydroprogne caspia</i>         | Caspian tern               | coastal                                                  |
| <i>Lanius excubitor</i>           | great grey shrike          | eastern                                                  |
| <i>Larus argentatus</i>           | European herring gull      | coastal-patchy                                           |
| <i>Larus fuscus</i>               | lesser black-backed gull   | coastal                                                  |
| <i>Larus marinus</i>              | great black-backed gull    | coastal                                                  |
| <i>Locustella naevia</i>          | common grasshopper warbler | eastern (colonized during the 20th century)              |
| <i>Lymnocyptes minimus</i>        | jack snipe                 | eastern                                                  |
| <i>Melanitta fusca</i>            | velvet scoter              | coastal-patchy                                           |
| <i>Mergellus albellus</i>         | smew                       | eastern                                                  |
| <i>Motacilla alba alba</i>        | white wagtail              | omnipresent                                              |
| <i>Motacilla cinerea</i>          | grey wagtail               | colonized Sweden in the 20th century                     |
| <i>Numenius phaeopus</i>          | whimbrel                   | eastern                                                  |

|                                 |                                |                                                                      |
|---------------------------------|--------------------------------|----------------------------------------------------------------------|
| <i>Oenanthe oenanthe</i>        | northern wheatear              | omnipresent                                                          |
| <i>Pandion haliaetus</i>        | osprey                         | eastern                                                              |
| <i>Perisoreus infaustus</i>     | Siberian jay                   | eastern                                                              |
| <i>Phylloscopus borealis</i>    | Arctic warbler                 | eastern                                                              |
| <i>Phylloscopus collybita</i>   | common chiffchaff              | patchy                                                               |
| <i>Picoides tridactylus</i>     | Eurasian three-toed woodpecker | eastern                                                              |
| <i>Picus canus</i>              | grey-headed woodpecker         | eastern-patchy                                                       |
| <i>Pinicola enucleator</i>      | pine grosbeak                  | eastern                                                              |
| <i>Podiceps auritus</i>         | horned grebe                   | eastern-patchy                                                       |
| <i>Podiceps grisegena</i>       | red-necked grebe               | patchy                                                               |
| <i>Poecile cinctus</i>          | Siberian tit                   | eastern                                                              |
| <i>Regulus regulus</i>          | goldcrest                      | eastern-patchy                                                       |
| <i>Somateria mollissima</i>     | common eider                   | coastal                                                              |
| <i>Stercorarius parasiticus</i> | parasitic jaeger               | coastal                                                              |
| <i>Sterna hirundo</i>           | common tern                    | coastal-patchy                                                       |
| <i>Sterna paradisaea</i>        | Arctic tern                    | coastal-patchy                                                       |
| <i>Streptopelia decaocto</i>    | Eurasian collared dove         | colonized Sweden in the 20th century                                 |
| <i>Strix nebulosa</i>           | great grey owl                 | eastern-patchy                                                       |
| <i>Strix uralensis</i>          | Ural owl                       | eastern                                                              |
| <i>Surnia ulula</i>             | northern hawk-owl              | eastern                                                              |
| <i>Tetrastes bonasia</i>        | hazel grouse                   | eastern                                                              |
| <i>Tringa erythropus</i>        | spotted redshank               | eastern                                                              |
| <i>Tringa nebularia</i>         | common greenshank              | eastern                                                              |
| <i>Tringa totanus</i>           | common redshank                | patchy                                                               |
| <i>Turdus iliacus</i>           | redwing                        | southern distribution limit south of boreal Sweden                   |
| <i>Turdus pilaris</i>           | fieldfare                      | omnipresent-eastern (20th century western range expansion in Europe) |
| <i>Uria aalge</i>               | common murre                   | coastal                                                              |

---
